# Supplementary material for: Multi-trait association analysis reveals shared genetic loci between Alzheimer’s disease and cardiovascular traits
Source: Springer Nature journal article supplement (doi:10.1038/s41467-024-53452-6), 2024-11-13
Supplement: MOESM1 [file 41467_2024_53452_MOESM1_ESM.pdf]

# Multi-trait association analysis reveals shared genetic loci between Alzheimer's disease and cardiovascular traits

## Supplementary Figures

Supplementary Figure 1 Manhattan plots of MTAG results for A) Alzheimer's disease and B) atrial fibrillation.

Supplementary Figure 2 Manhattan plots of MTAG results for A) Alzheimer's disease and B) coronary artery disease.

Supplementary Figure 3 Manhattan plots of MTAG results for A) Alzheimer's disease and B) carotid intima-media thickness.

Supplementary Figure 4 Manhattan plots of MTAG results for A) Alzheimer's disease and B) stroke.

Supplementary Figure 5 Manhattan plots of MTAG results for A) Alzheimer's disease, B) systolic blood pressure and C) diastolic blood pressure.

Supplementary Figure 6 QQ-plots of bivariate MTAG analyses for Alzheimer's disease and the examined cardiovascular traits

Supplementary Figure 7 Regional plots of *PLEC* region across different genome-wide association studies on Alzheimer's disease

Supplementary Figure 8 Regional plots on the colocalized loci between Alzheimer's disease (bottom), cardiovascular trait (middle) and the expression quantitative trait loci for the respective tissues (top)

Supplementary Figure 9 Enriched pathways of the *PLEC*-containing module in cardiomyocytes using single cell data of cardiac tissue from heart failure cases and healthy controls.

Supplementary Figure 10 Enriched pathways of the *C1Q*-containing module in macrophages using single-nuclei transcriptomes of cardiac tissue from dilated cardiomyopathy cases and healthy controls.

Supplementary Figure 11 Enrichment of pathway genes in the protein interactomes of candidate genes in cardiomyocytes using single cell data enriched for cardiomyocytes from heart failure cases and healthy controls. The *PLEC*-interacting module is the turquoise and the *C1Q*-interacting module is the yellow.

Supplementary Figure 12 Enrichment of pathway genes in the protein interactomes of candidate genes in macrophages in cardiac tissue using single nuclei data from dilated cardiomyopathy cases and healthy controls. The *PLEC*-interacting module is the blue and the *C1Q*-interacting module is the green.

Supplementary Figure 13 Enriched pathways of the *C1Q*-containing module in microglia using single-nuclei transcriptomes of human post-mortem brain tissue from Alzheimer's disease cases and healthy controls.

Supplementary Figure 14 Pseudo-time figure of spline functions fitted to normalised gene expression for *C1Q* genes (A, *C1QA*; B, *C1QB*; C, *C1QC*) as a function of local tissue beta-amyloid load assessed as Immunohistochemical 4G8+ area in neocortical tissue from donor brains without (turquoise) or with (orange) AD. The corresponding raw data and best fit curves are shown below each panel.

Supplementary Figure 15 Enrichment of pathway genes in the protein interactomes of candidate genes in microglia using single nuclei transcriptomes of human post-mortem brain tissue from Alzheimer's disease cases and healthy controls. The C1Q-interacting module is the turquoise.

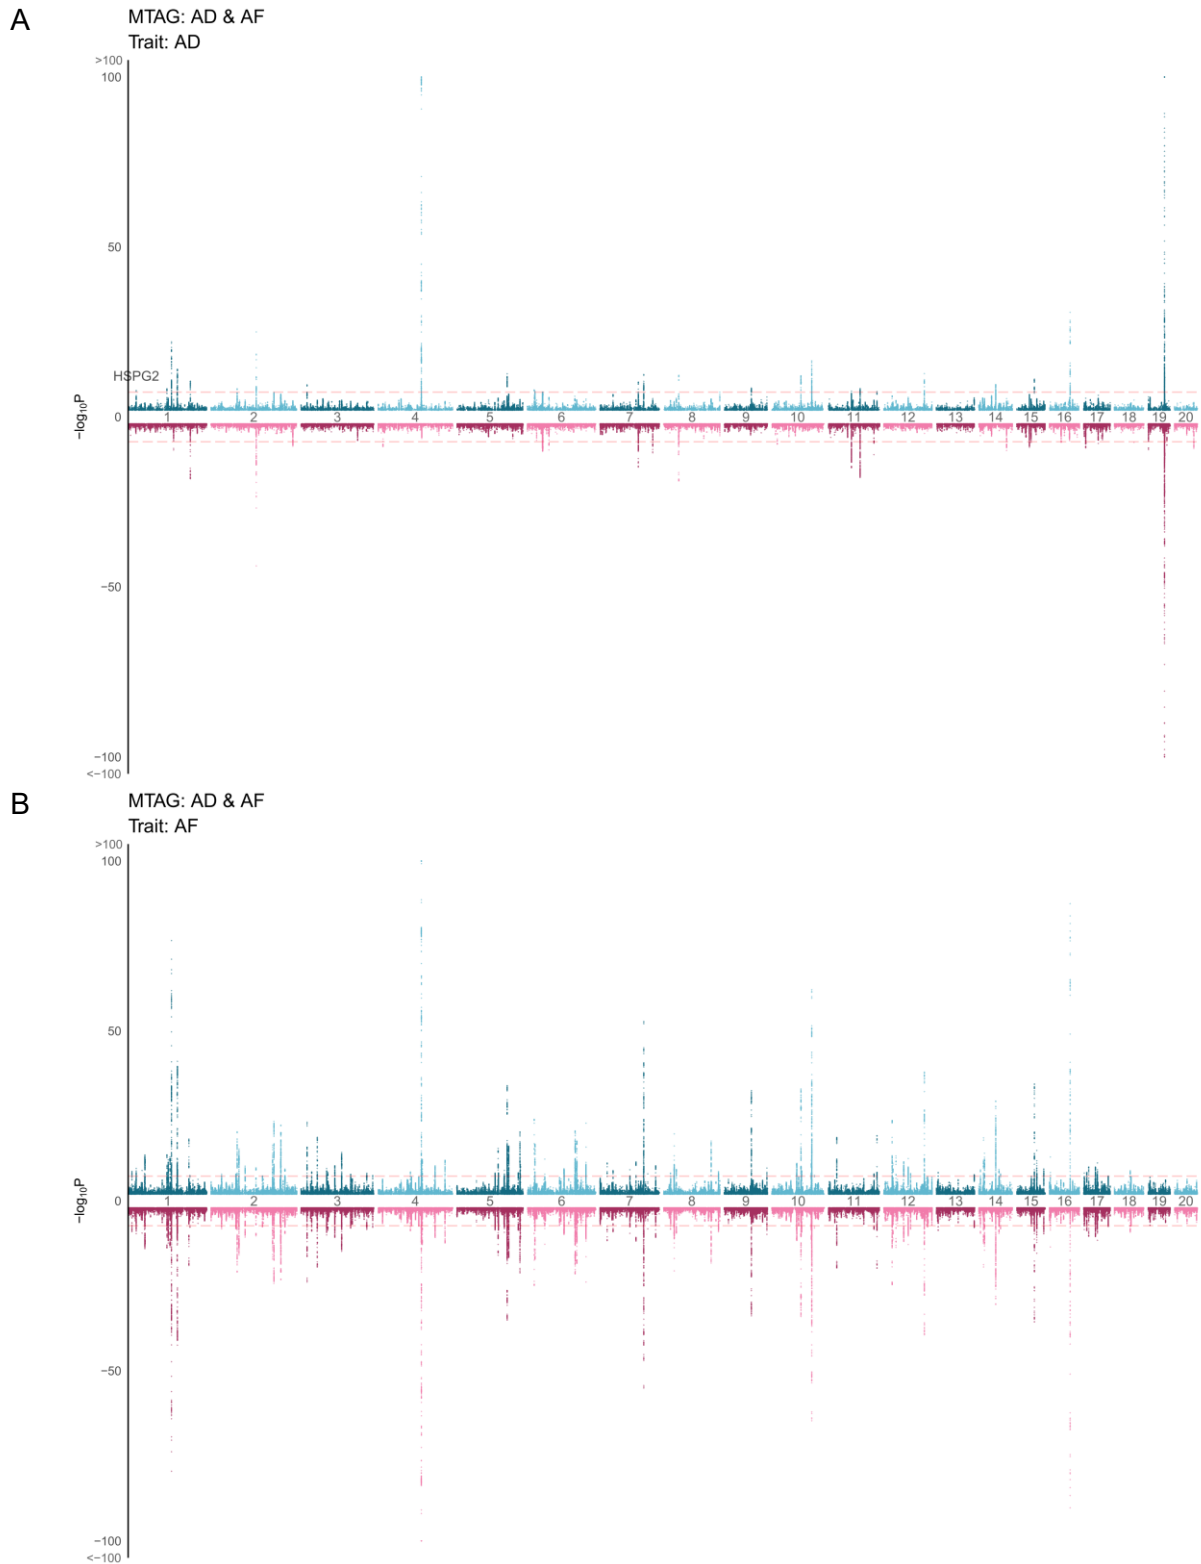

**Supplementary Figure 1**      **Manhattan plots of MTAG results for A) Alzheimer's disease and B) atrial fibrillation.**

Each mirror Manhattan plot illustrates the results from the MTAG analysis (upper part in turquoise) compared with the original GWAS results for the same trait and the same set of SNPs (lower part in red). Annotated genes denote novel discoveries identified by the MTAG analysis.  
AD Alzheimer's disease, AF atrial fibrillation.

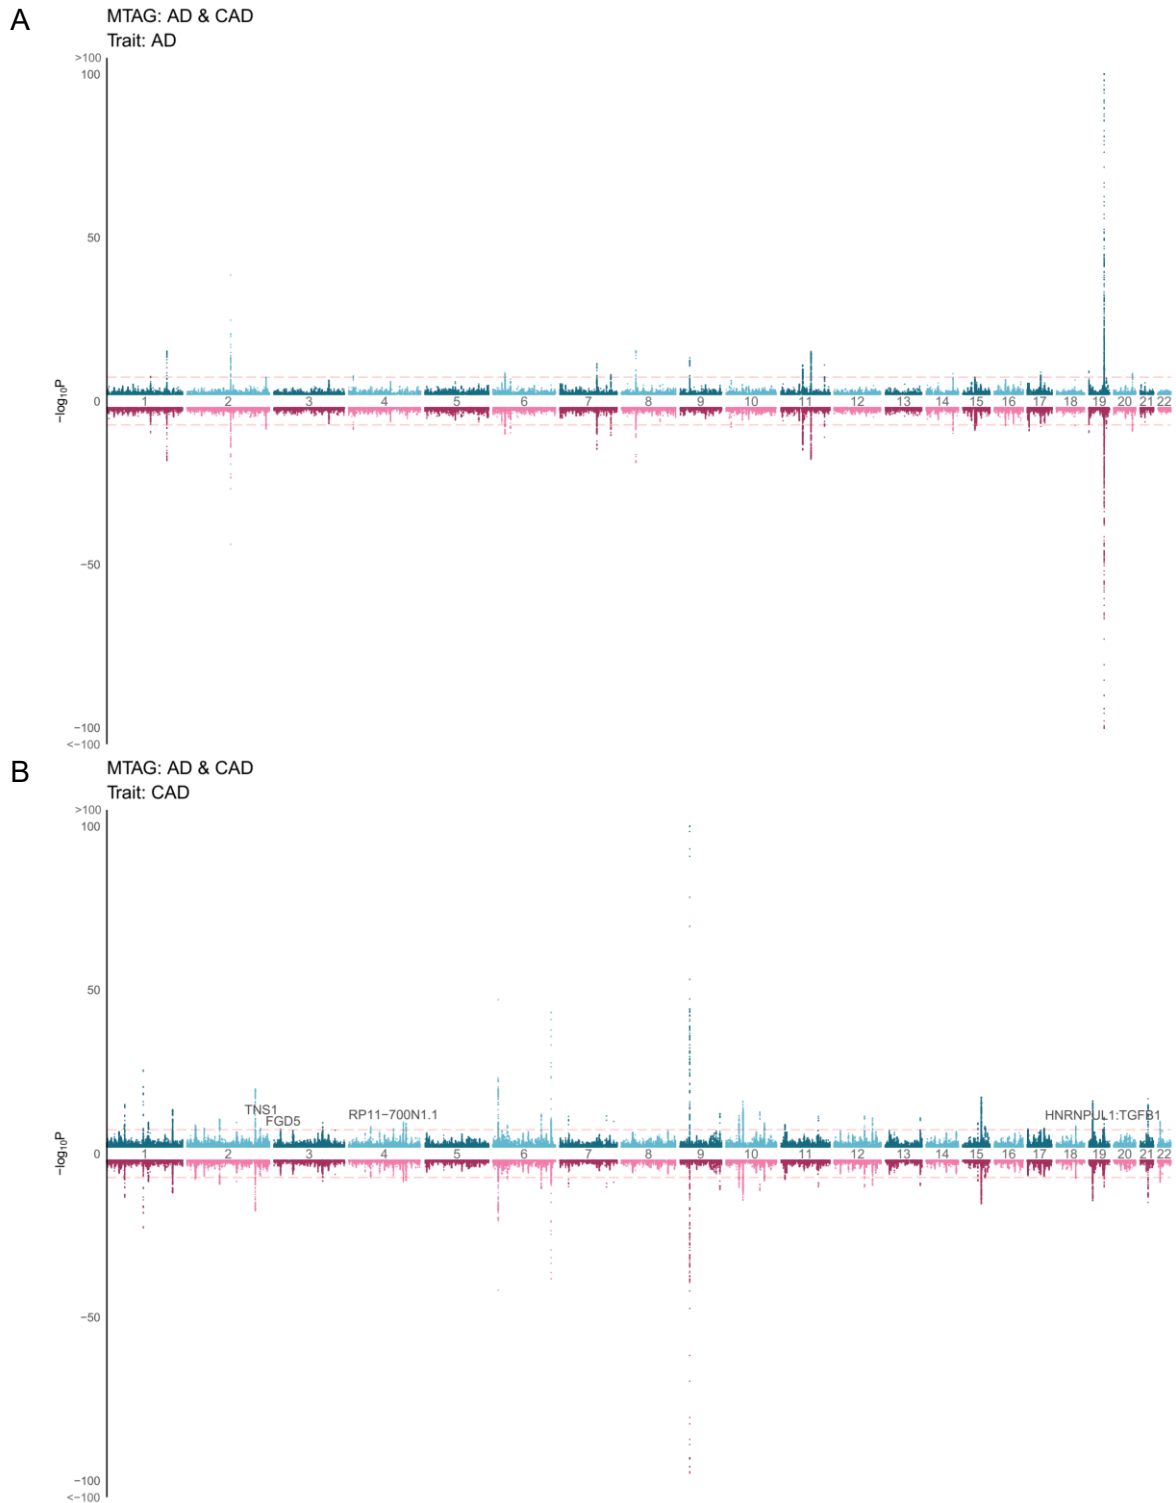

**Supplementary Figure 2**      **Manhattan plots of MTAG results for A) Alzheimer's disease and B) coronary artery disease.**

Each mirror Manhattan plot illustrates the results from the MTAG analysis (upper part in turquoise) compared with the original GWAS results for the same trait and the same set of SNPs (lower part in red). Annotated genes represent novel discoveries identified by the MTAG analysis.  
AD Alzheimer's disease, CAD coronary artery disease.

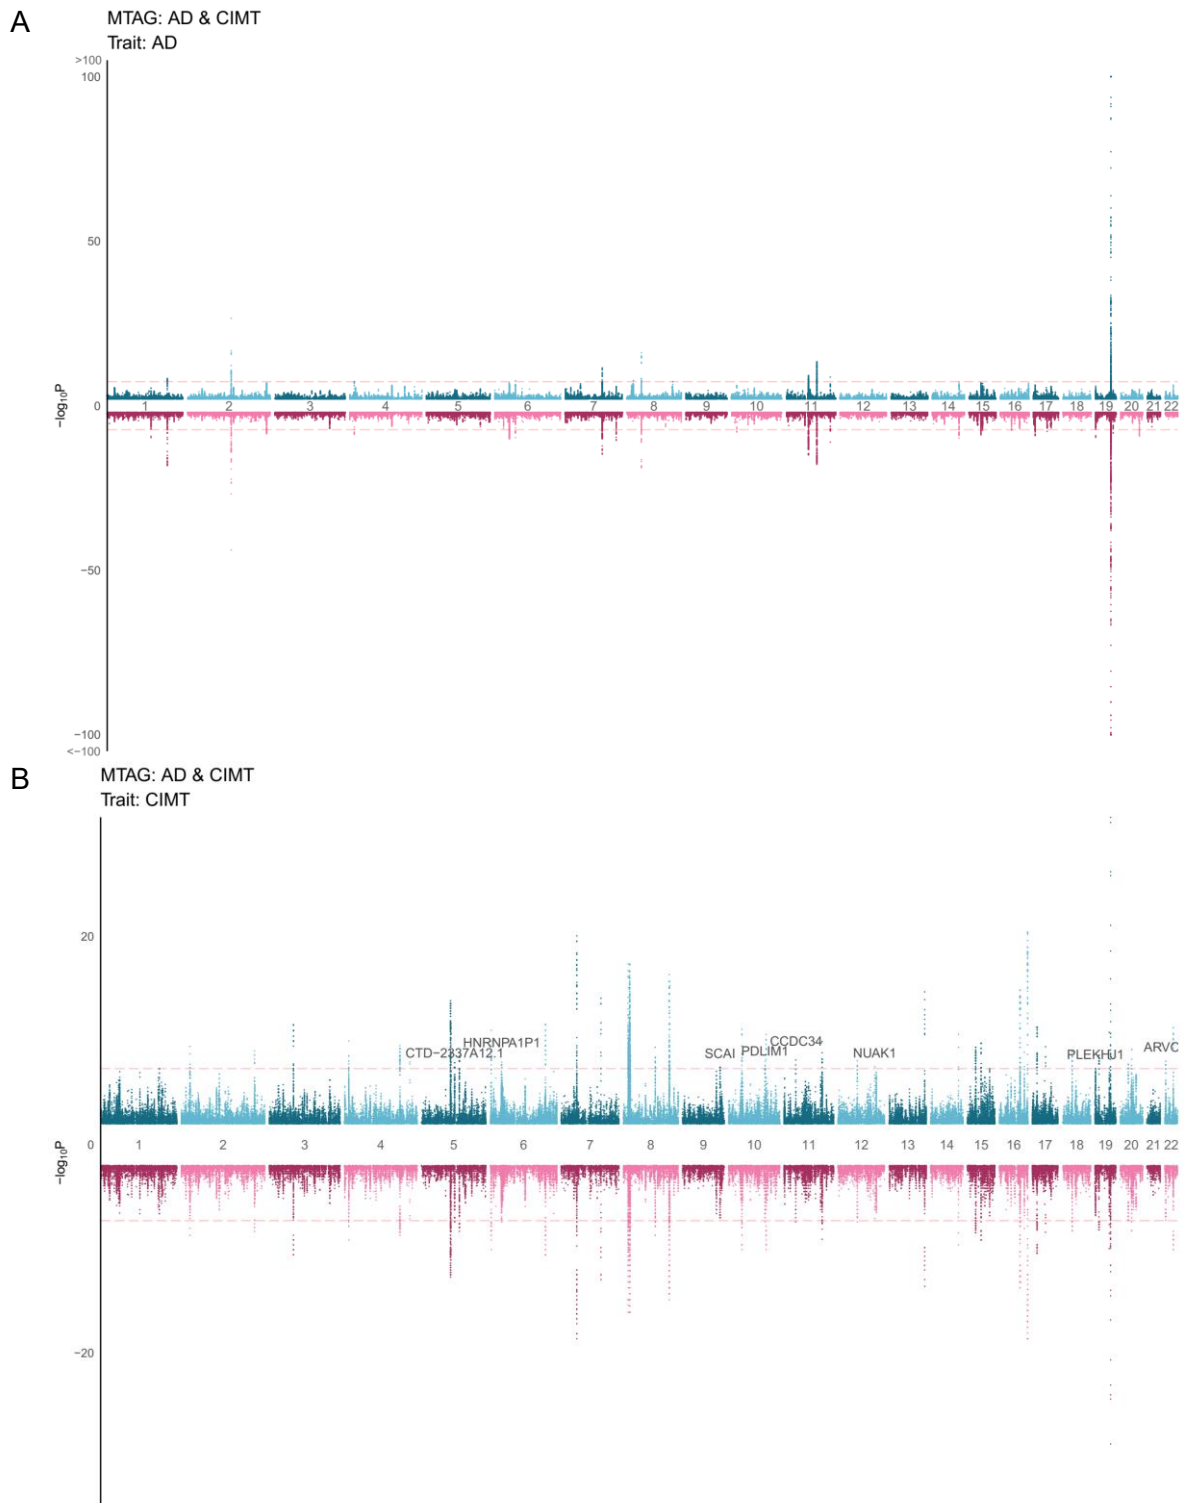

**Supplementary Figure 3**      **Manhattan plots of MTAG results for A) Alzheimer's disease and B) carotid intima-media thickness.**

Each mirror Manhattan plot illustrates the results from the MTAG analysis (upper part in turquoise) compared with the original GWAS results for the same trait and the same set of SNPs (lower part in red). Annotated genes represent novel discoveries identified by the MTAG analysis.  
AD Alzheimer's disease, CIMT carotid intima-media thickness.

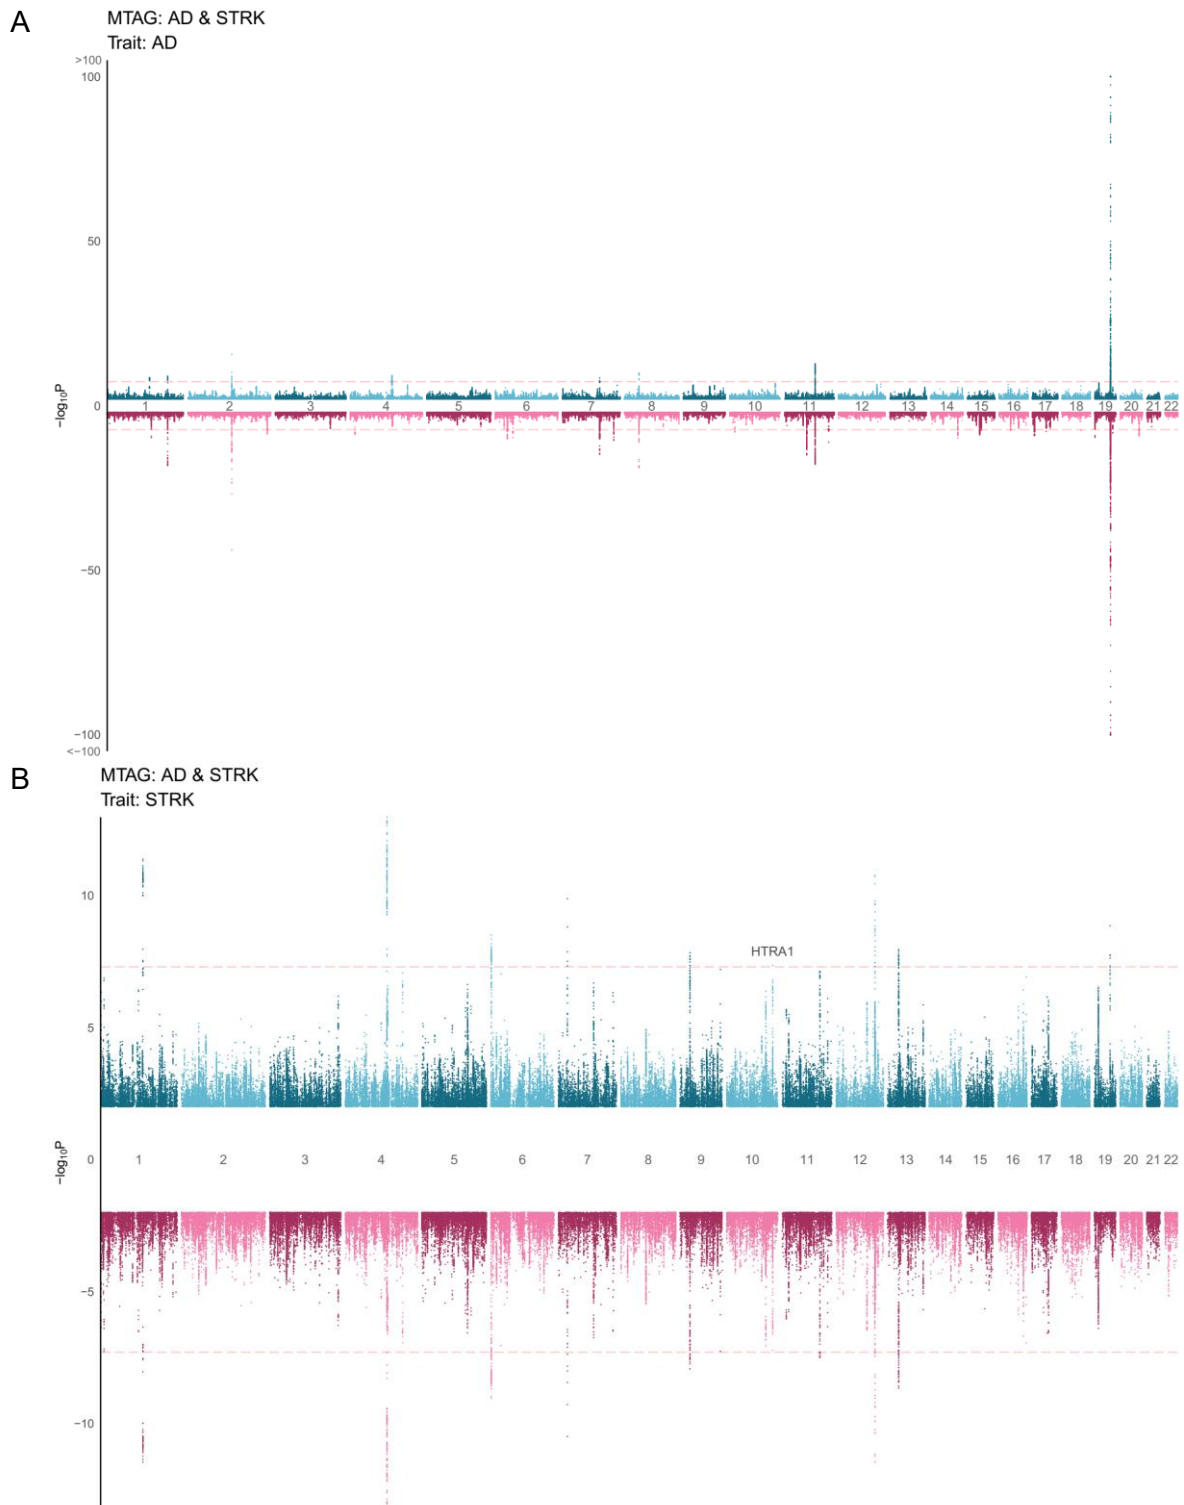

**Supplementary Figure 4**      **Manhattan plots of MTAG results for A) Alzheimer's disease and B) stroke.**

Each mirror Manhattan plot illustrates the results from the MTAG analysis (upper part in turquoise) compared with the original GWAS results for the same trait and the same set of SNPs (lower part in red). Annotated genes represent novel discoveries identified by the MTAG analysis.  
AD Alzheimer's disease, STRK stroke.

A

MTAG: AD & BP  
Trait: AD

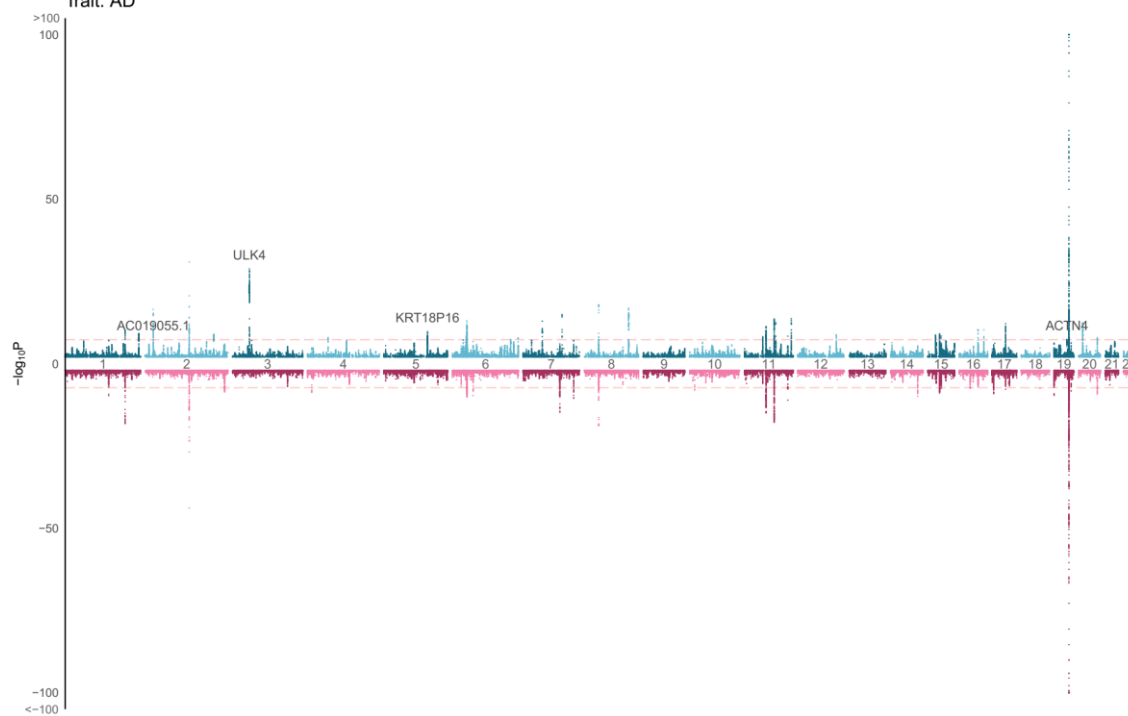

B

MTAG: AD & BP  
Trait: SBP

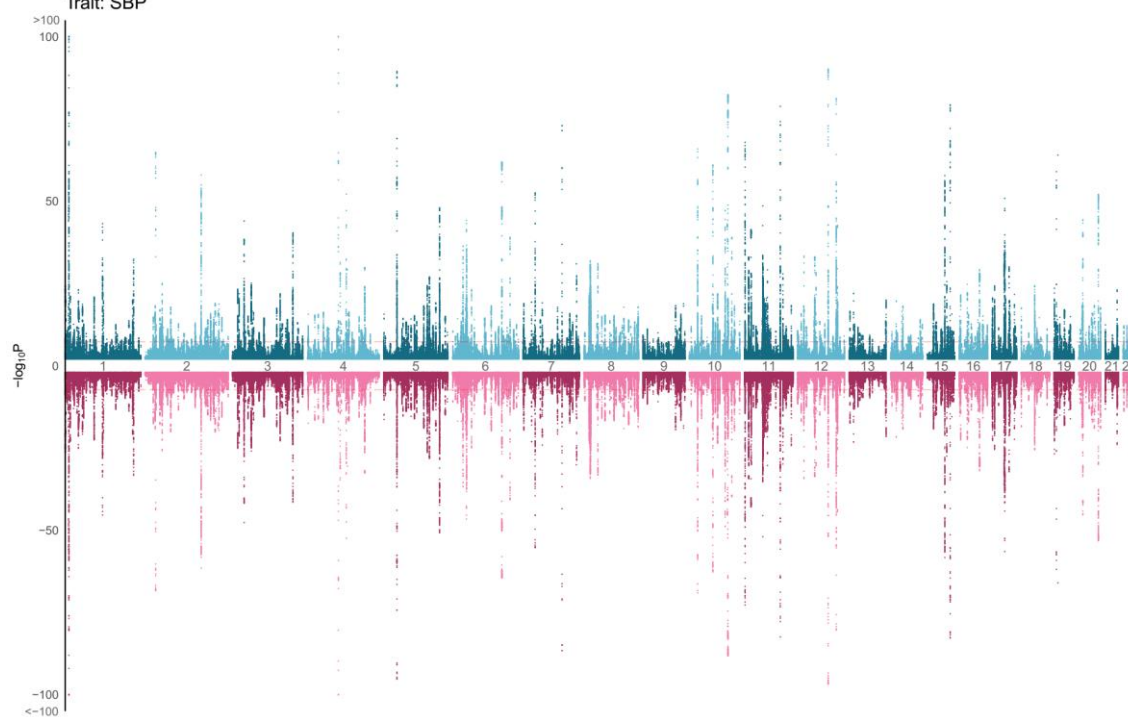

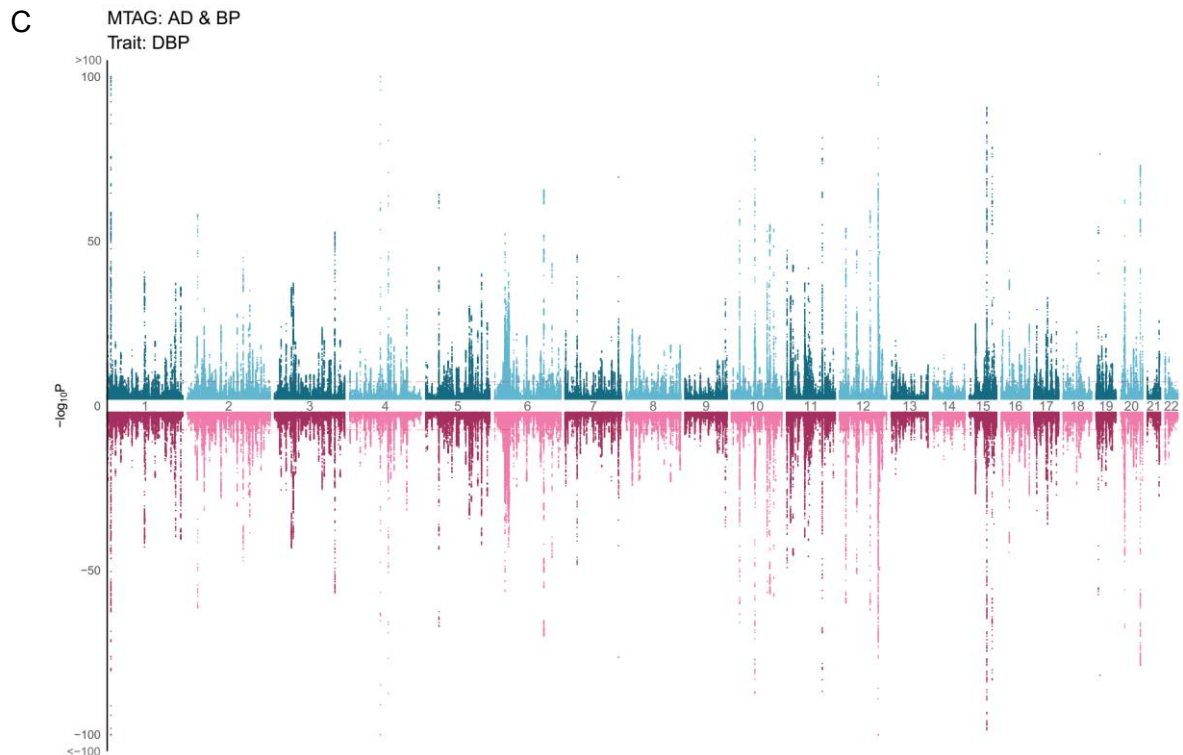

**Supplementary Figure 5** Manhattan plots of MTAG results for A) Alzheimer's disease, B) systolic blood pressure and C) diastolic blood pressure.

Each mirror Manhattan plot illustrates the results from the MTAG analysis (upper part in turquoise) compared with the original GWAS results for the same trait and the same set of SNPs (lower part in red). Annotated genes represent novel discoveries identified by the MTAG analysis.

AD Alzheimer's disease, BP blood pressure, SBP systolic blood pressure, DBP diastolic blood pressure.



**A** MTAG: AD & AF  
Trait: AD

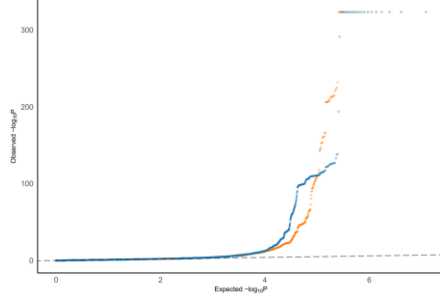

**B** MTAG: AD & AF  
Trait: AF

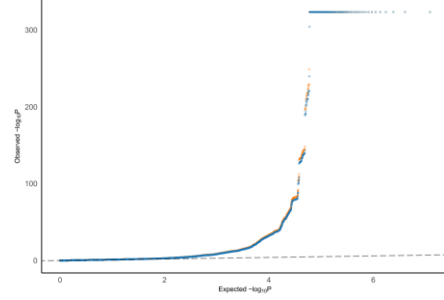

**C** MTAG: AD & CAD  
Trait: AD

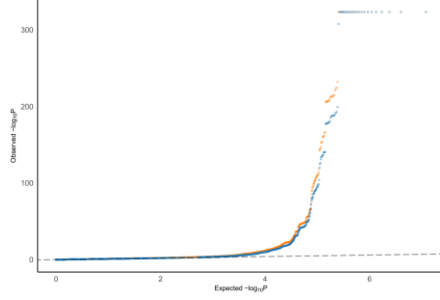

**D** MTAG: AD & CAD  
Trait: CAD

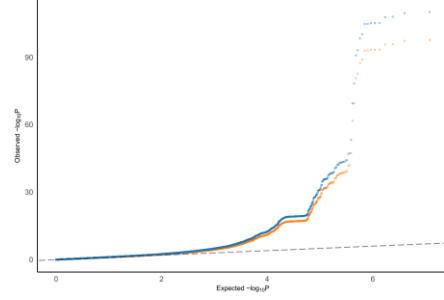

**E** MTAG: AD & CIMT  
Trait: AD

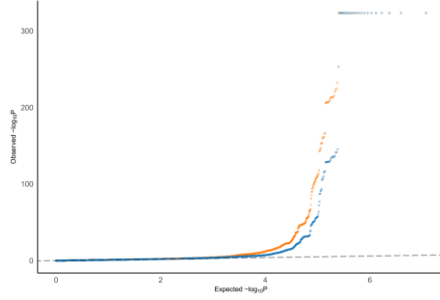

**F** MTAG: AD & CIMT  
Trait: CIMT

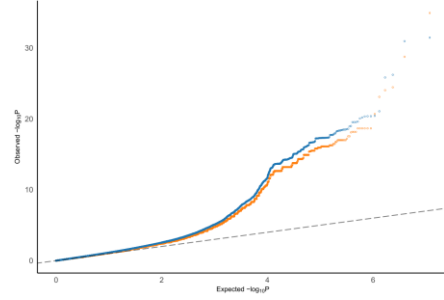

**G** MTAG: AD & STRK  
Trait: AD

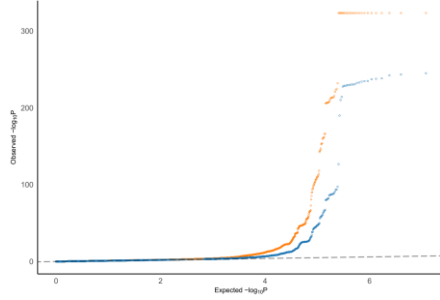

**H** MTAG: AD & STRK  
Trait: STRK

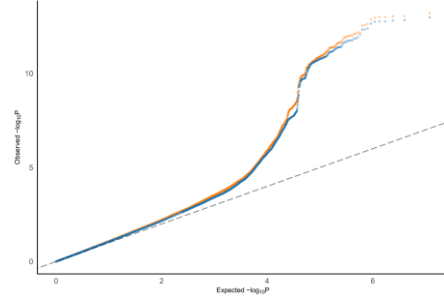

**I** MTAG: AD-BP  
Trait: AD

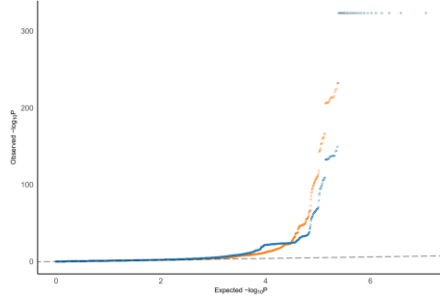

**J** MTAG: AD-BP  
Trait: SBP

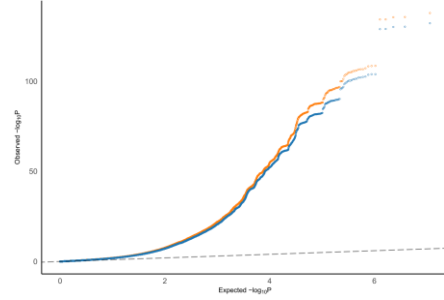

**K** MTAG: AD-BP

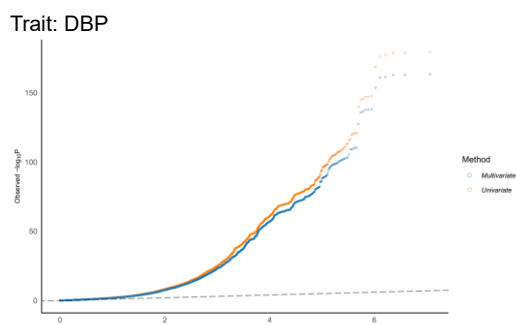

**Supplementary Figure 6** QQ-plots of bivariate MTAG analyses for Alzheimer's disease and the examined cardiovascular traits

This figure presents the QQ-plots resulting from five bivariate MTAG analyses, each comparing Alzheimer's disease (AD) with a different cardiovascular trait. The examined traits alongside AD include atrial fibrillation (AF), coronary artery disease (CAD), carotid intima-media thickness (cIMT), stroke (STRK), and blood pressure (BP). Each QQ-plot displays the observed versus expected  $-\log_{10}(P\text{-values})$  for genetic associations, comparing the MTAG results (blue) with the original GWAS results (orange) for the same trait and the same set of SNPs. The plots are organised as follows: A) AD results from the AD-AF MTAG analysis, B) AF results from the AD-AF MTAG analysis, C) AD results from the AD-CAD MTAG analysis, D) CAD results from the AD-CAD MTAG analysis, E) AD results from the AD-CIMT MTAG analysis, F) CIMT results from the AD-CIMT MTAG analysis, G) AD results from the AD-STRK MTAG analysis, H) STRK results from the AD-STRK MTAG analysis, I) AD results from the AD-BP MTAG analysis, J) SBP results from the AD-BP MTAG analysis, K) DBP results from the AD-BP MTAG analysis.

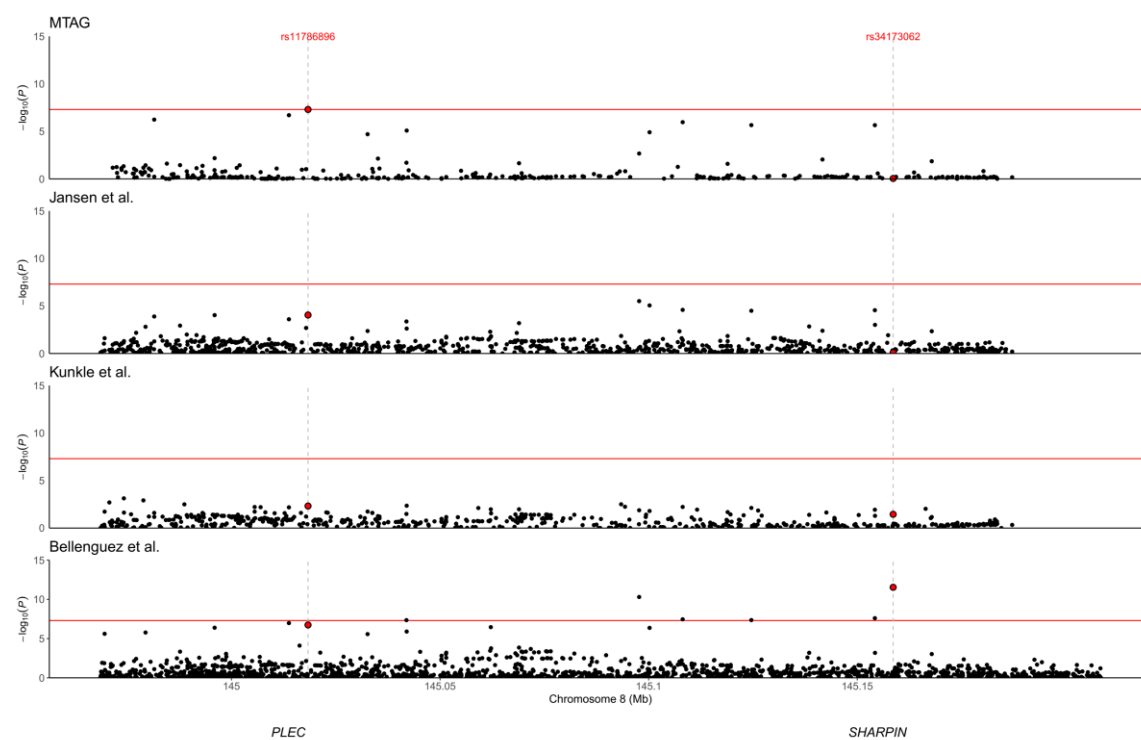

**Supplementary Figure 7** Regional plots of *PLEC* region across different genome-wide association studies on Alzheimer's disease

The variant rs11786896 (*PLEC*), which was indicated by MTAG as a top signal associated with Alzheimer's disease is located approximately 150kb upstream from another previously identified variant (rs34173062). The two variants likely represent two independent signals (linkage disequilibrium  $r^2 = 0.006$ )

rs7529220

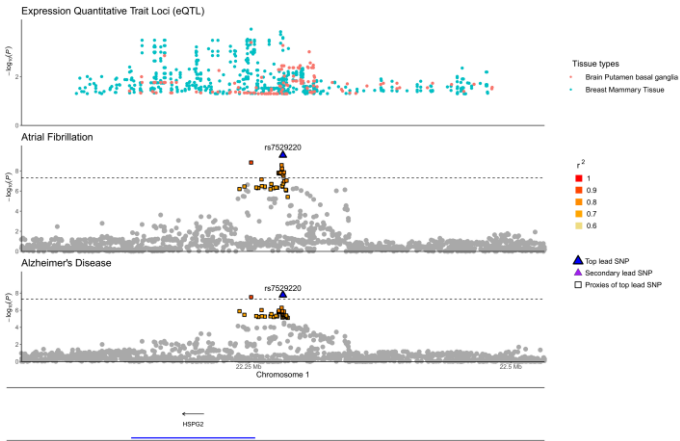

rs17362588

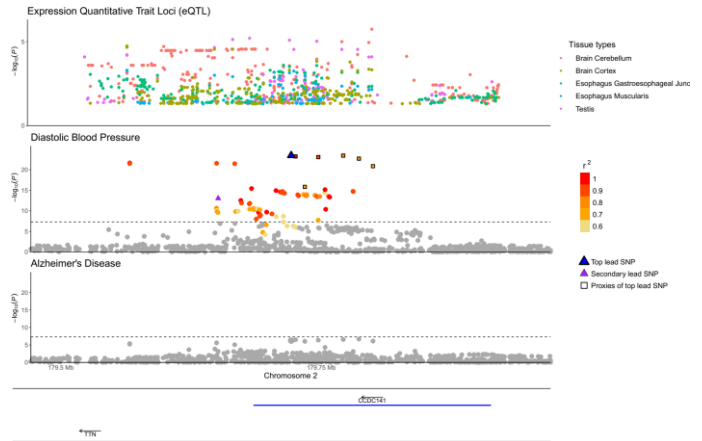

rs6738011

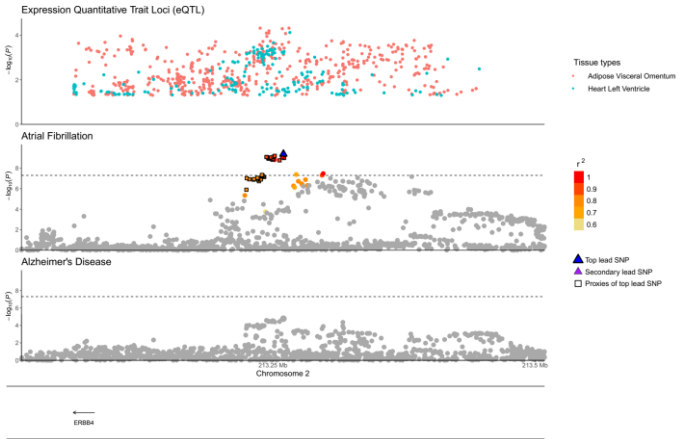

rs77399788

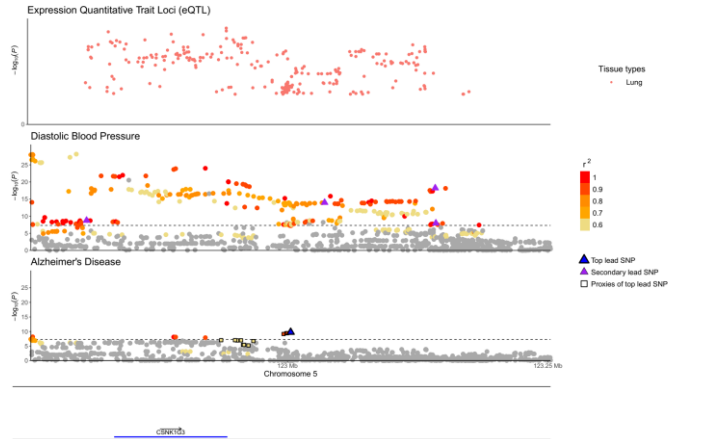

rs10949499

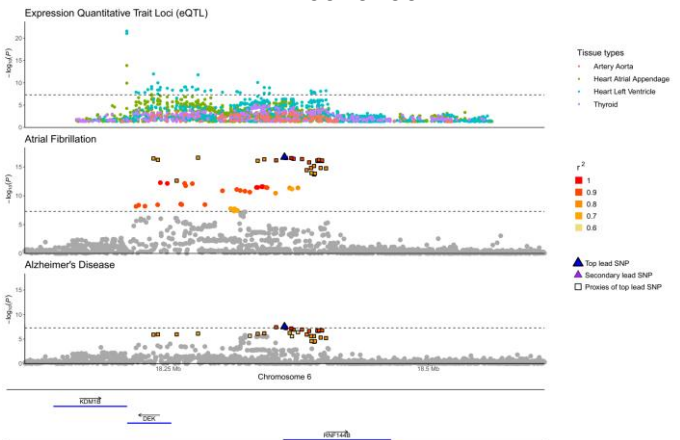

rs9399136

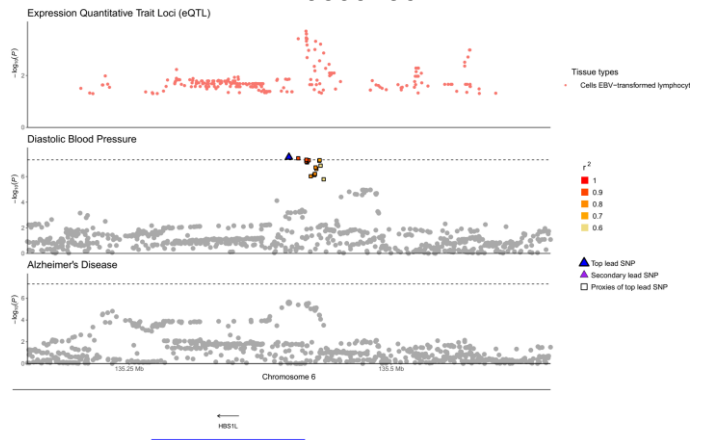

rs7834729

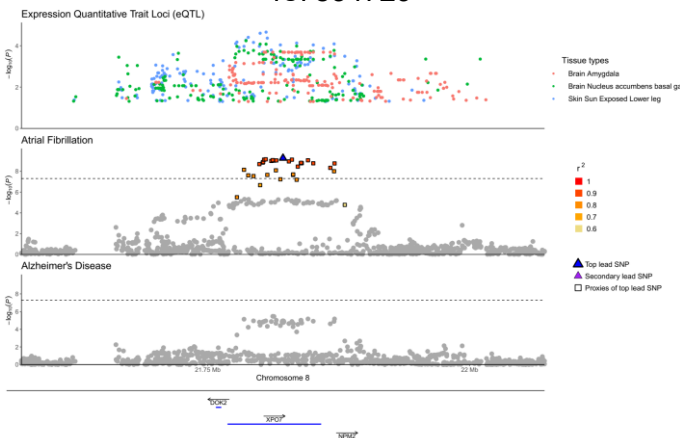

rs62521286

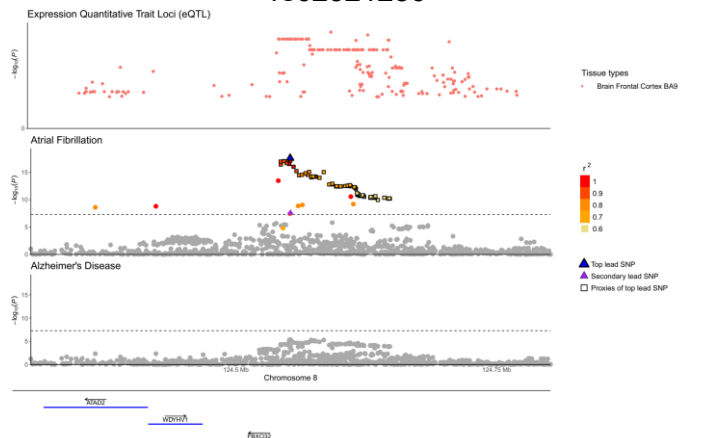

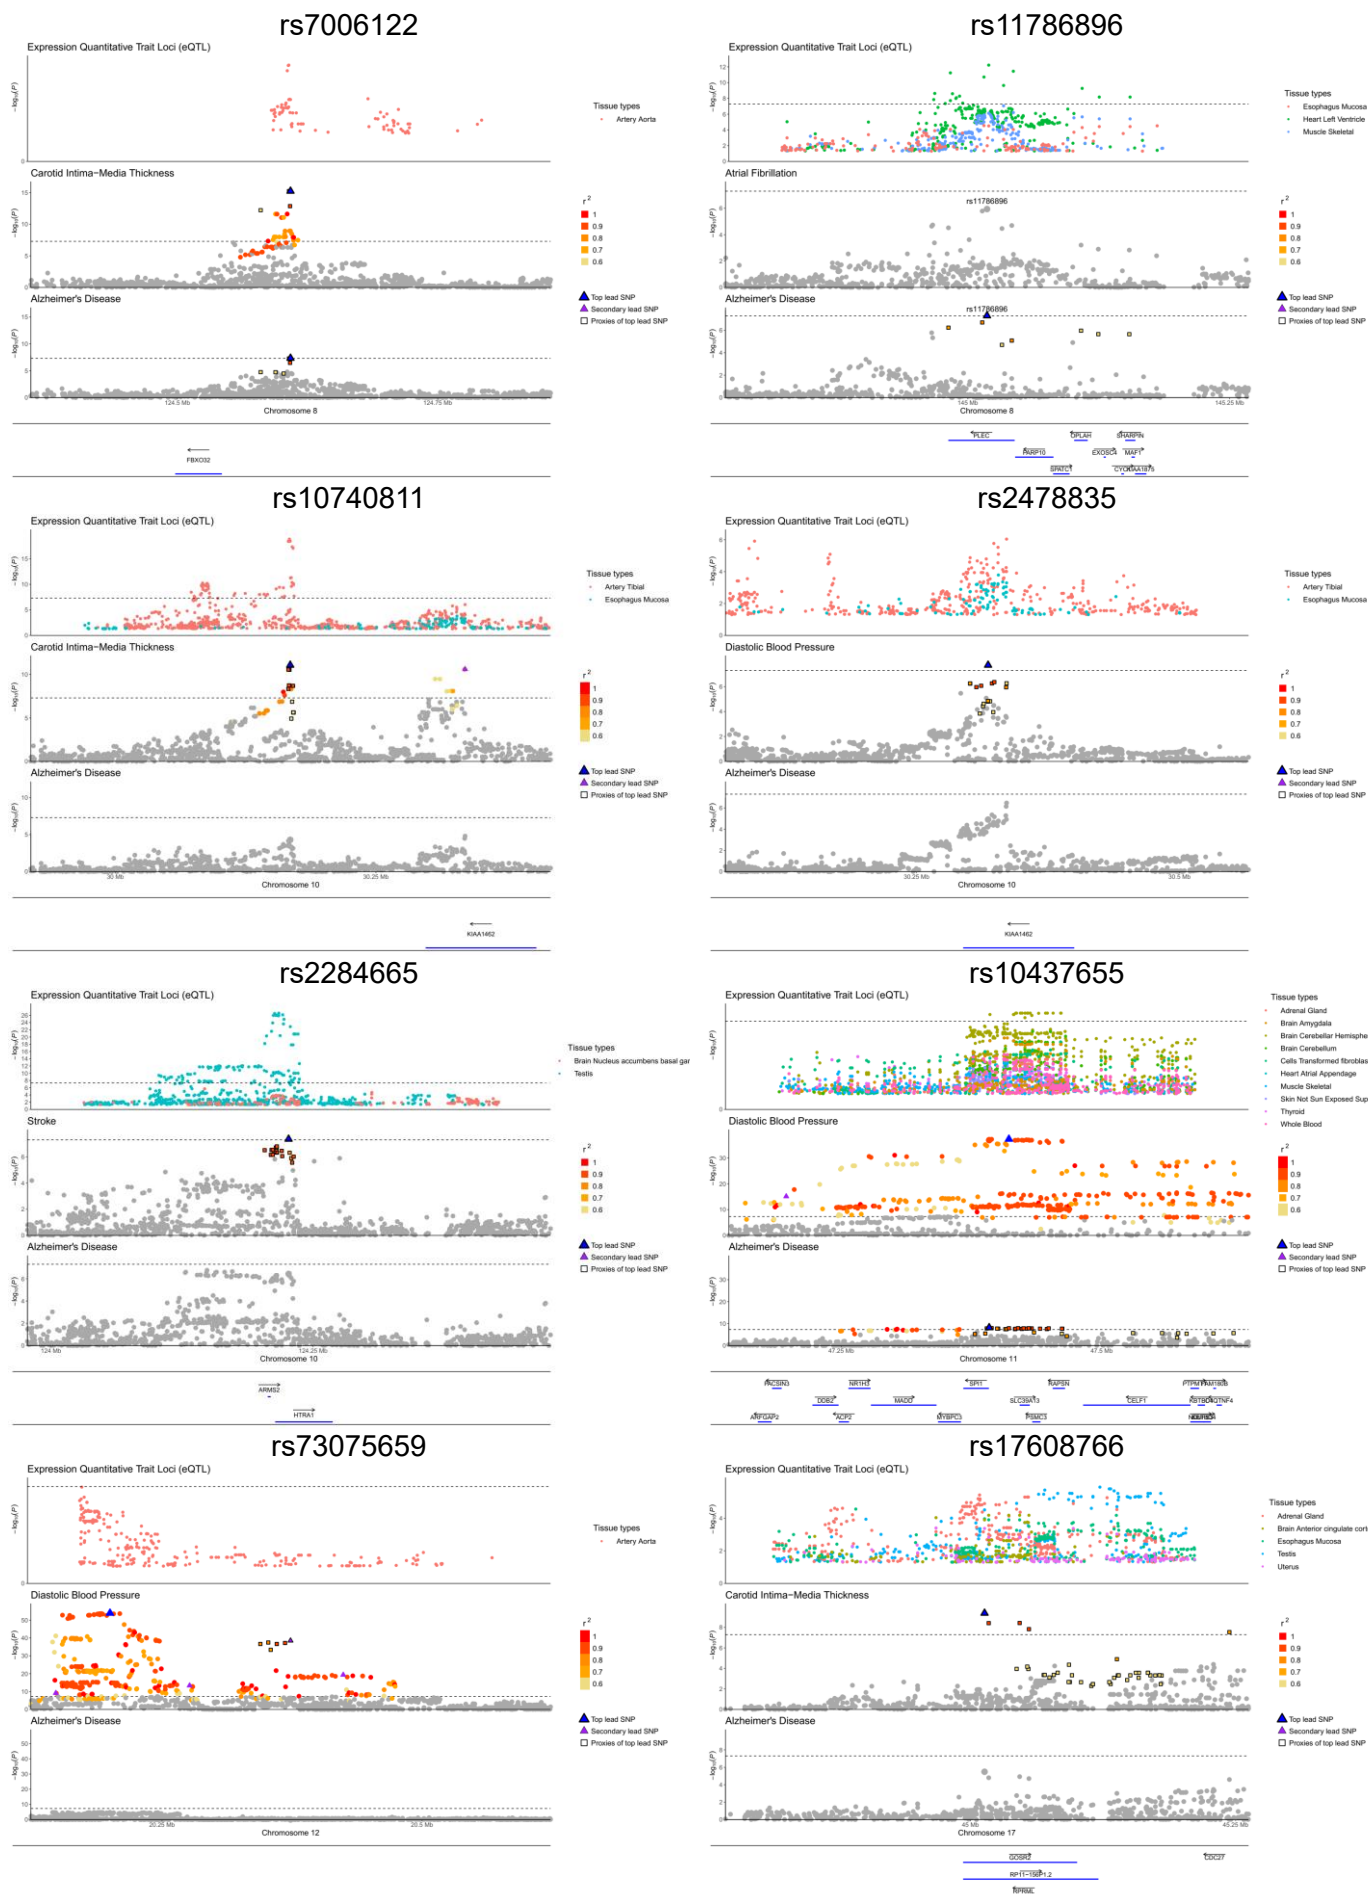

**Supplementary Figure 8** Regional plots on the colocalized loci between Alzheimer's disease (bottom), cardiovascular trait (middle) and the expression quantitative trait loci for the respective tissues (top)

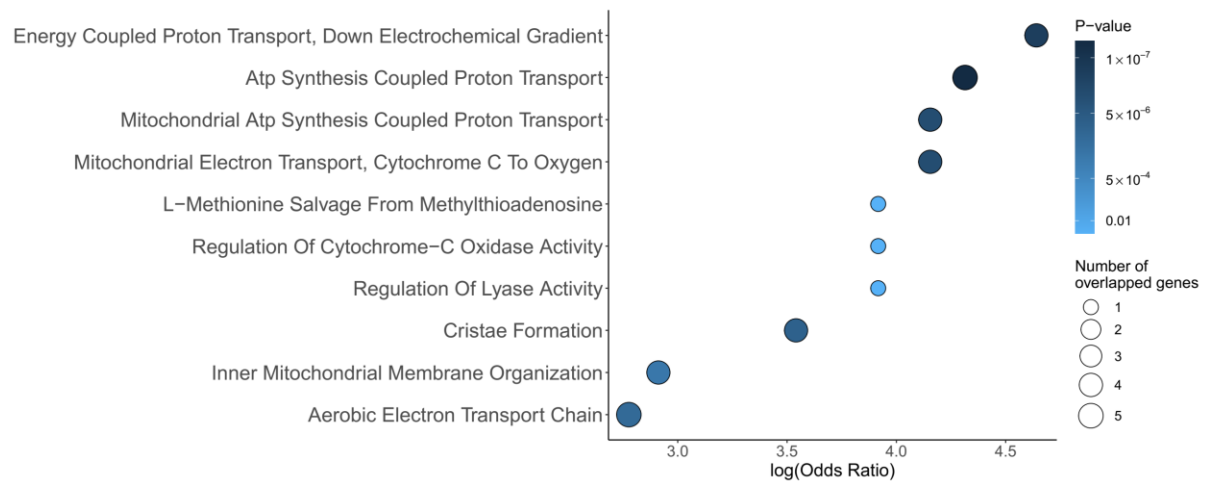

**Supplementary Figure 9** Enriched pathways of the *PLEC*-containing module in cardiomyocytes using single cell data of cardiac tissue from heart failure cases and healthy controls.

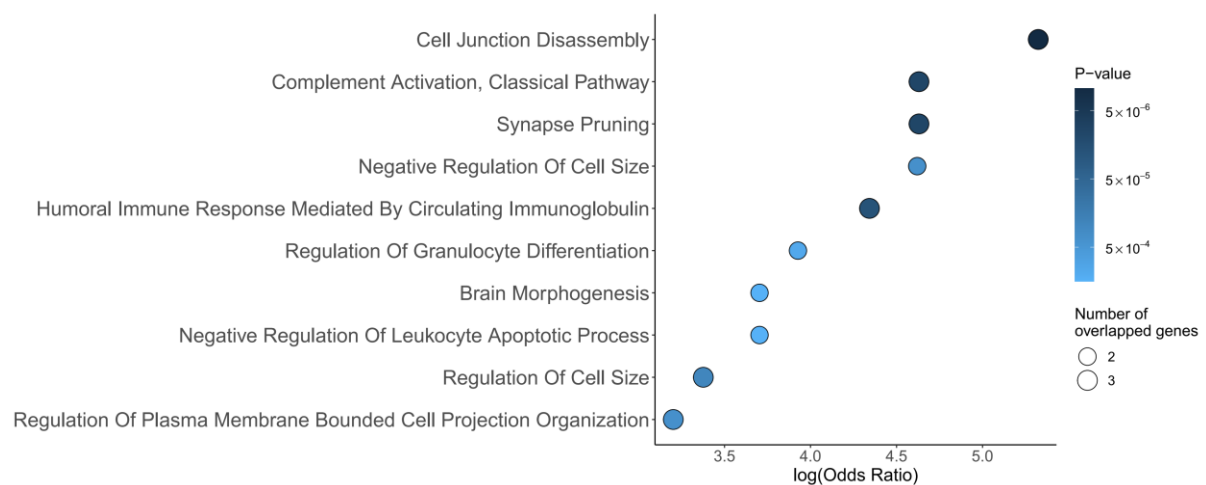

**Supplementary Figure 10** Enriched pathways of the *C1Q*-containing module in macrophages using single-nuclei transcriptomes of cardiac tissue from dilated cardiomyopathy cases and healthy controls.

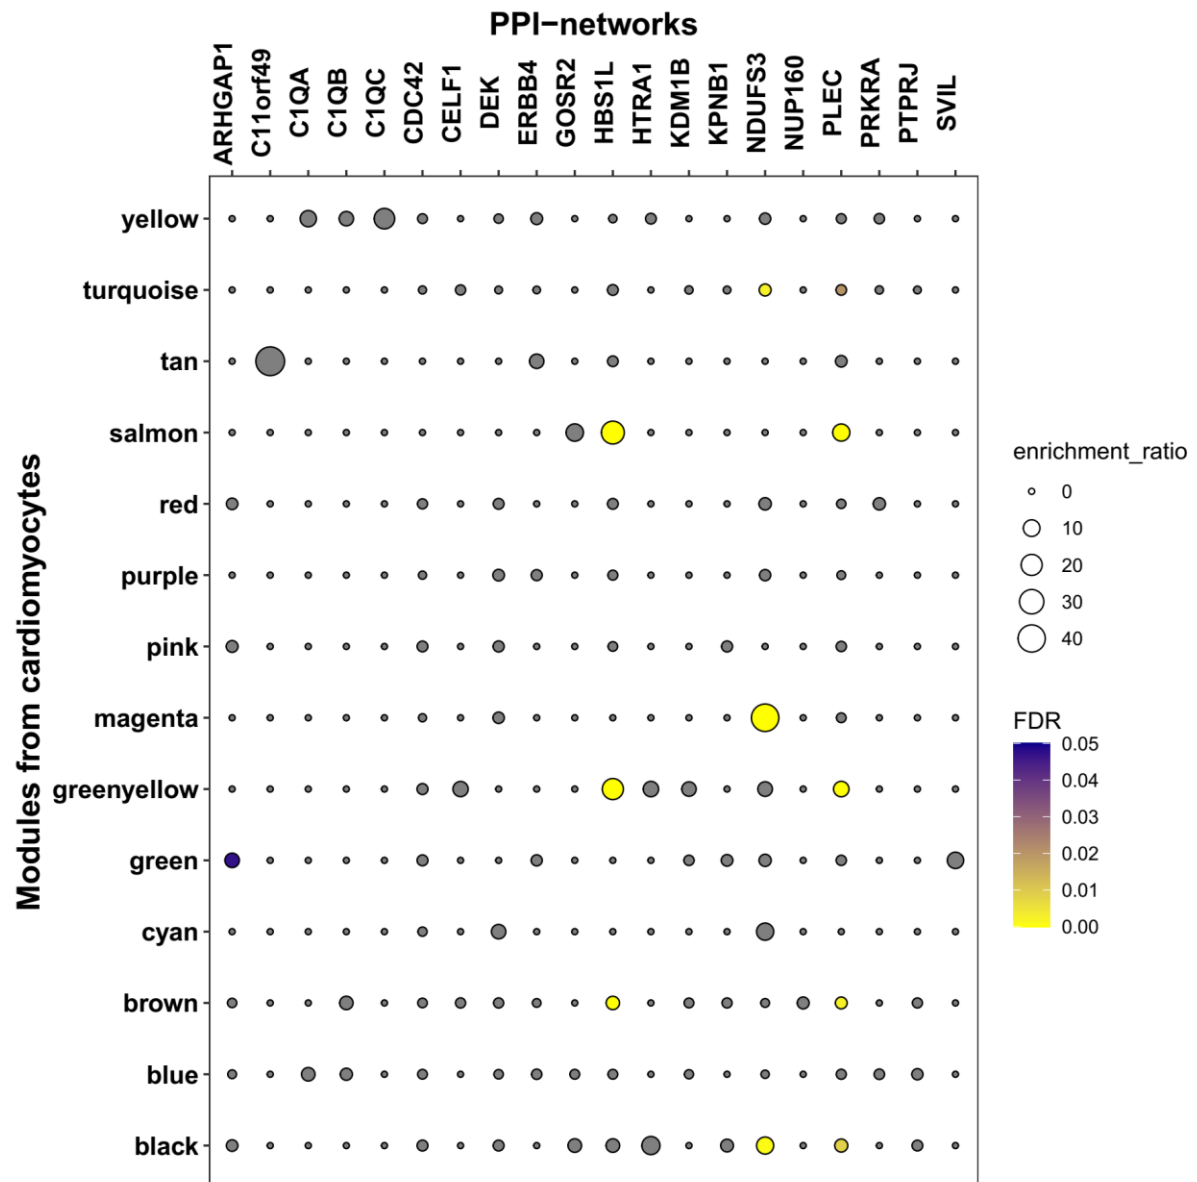

**Supplementary Figure 11** Enrichment of pathway genes in the protein interactomes of candidate genes in cardiomyocytes using single cell data enriched for cardiomyocytes from heart failure cases and healthy controls. The PLEC-interacting module is the turquoise and the C1Q-interacting module is the yellow.

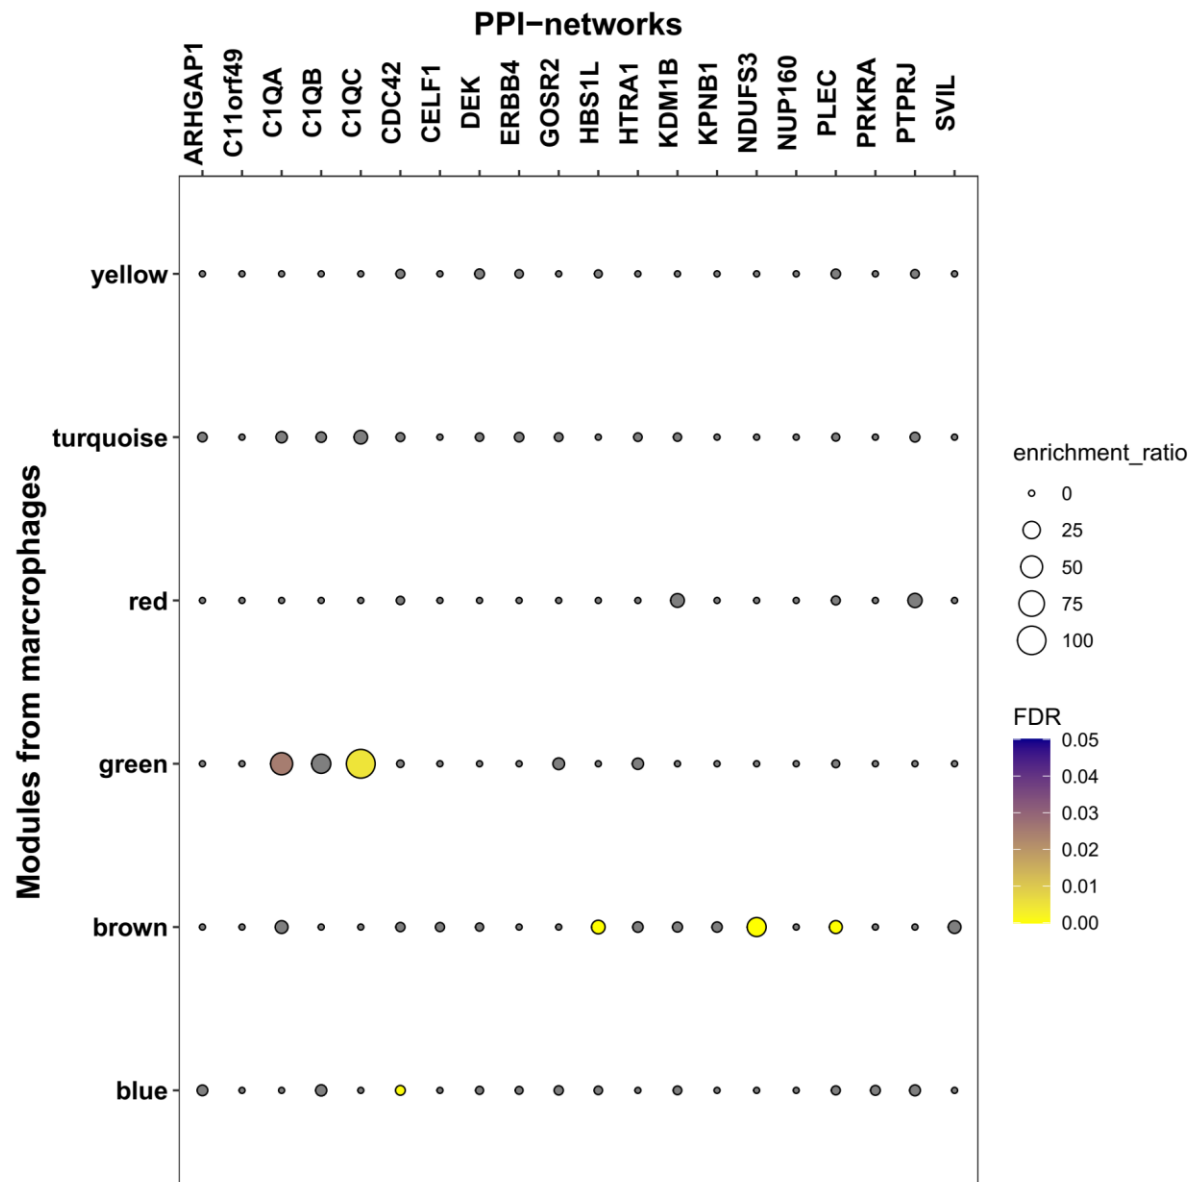

**Supplementary Figure 12** Enrichment of pathway genes in the protein interactomes of candidate genes in macrophages in cardiac tissue using single nuclei data from dilated cardiomyopathy cases and healthy controls. The PLEC-interacting module is the blue and the C1Q-interacting module is the green.

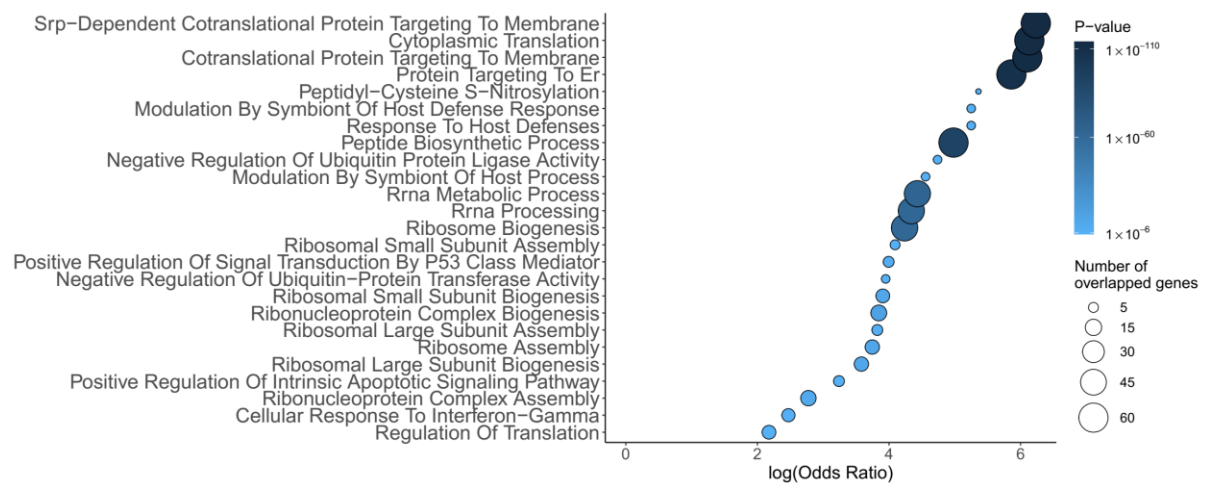

**Supplementary Figure 13** Enriched pathways of the C1Q-containing module in microglia using single-nuclei transcriptomes of human post-mortem brain tissue from Alzheimer's disease cases and healthy controls.

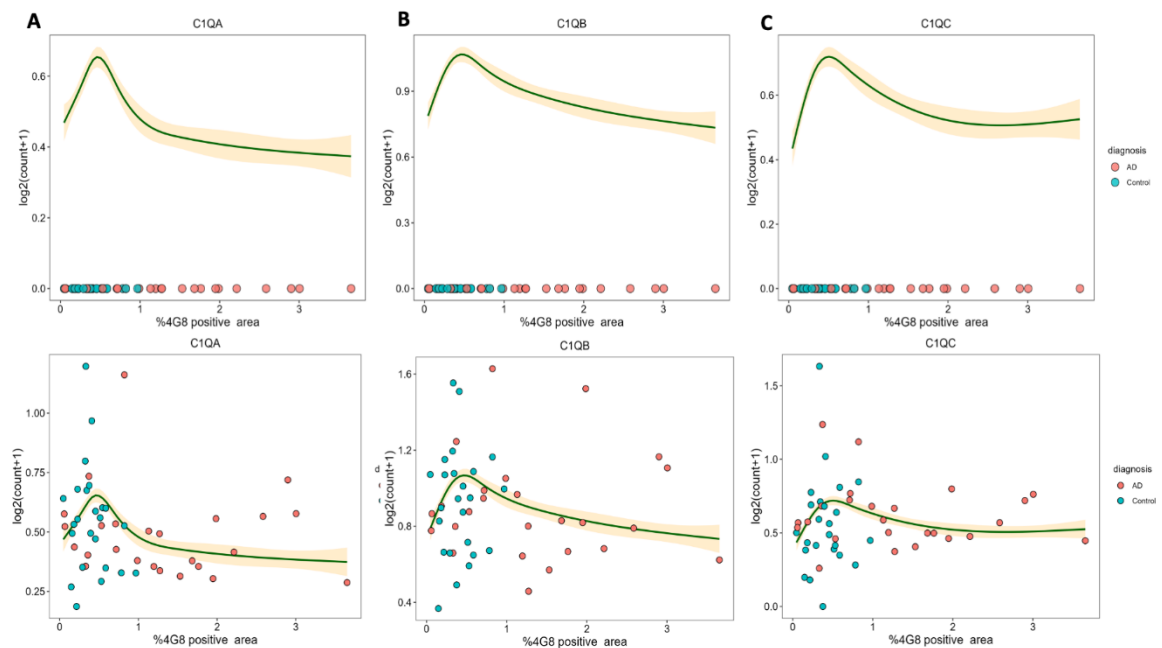

**Supplementary Figure 14** Pseudo-time figure of spline functions fitted to normalised gene expression for C1Q genes (A, C1QA; B, C1QB; C, C1QC) as a function of local tissue beta-amyloid load assessed as Immunohistochemical 4G8+ area in neocortical tissue from donor brains without (turquoise) or with (orange) AD. The corresponding raw data and best fit curves are shown below each panel.



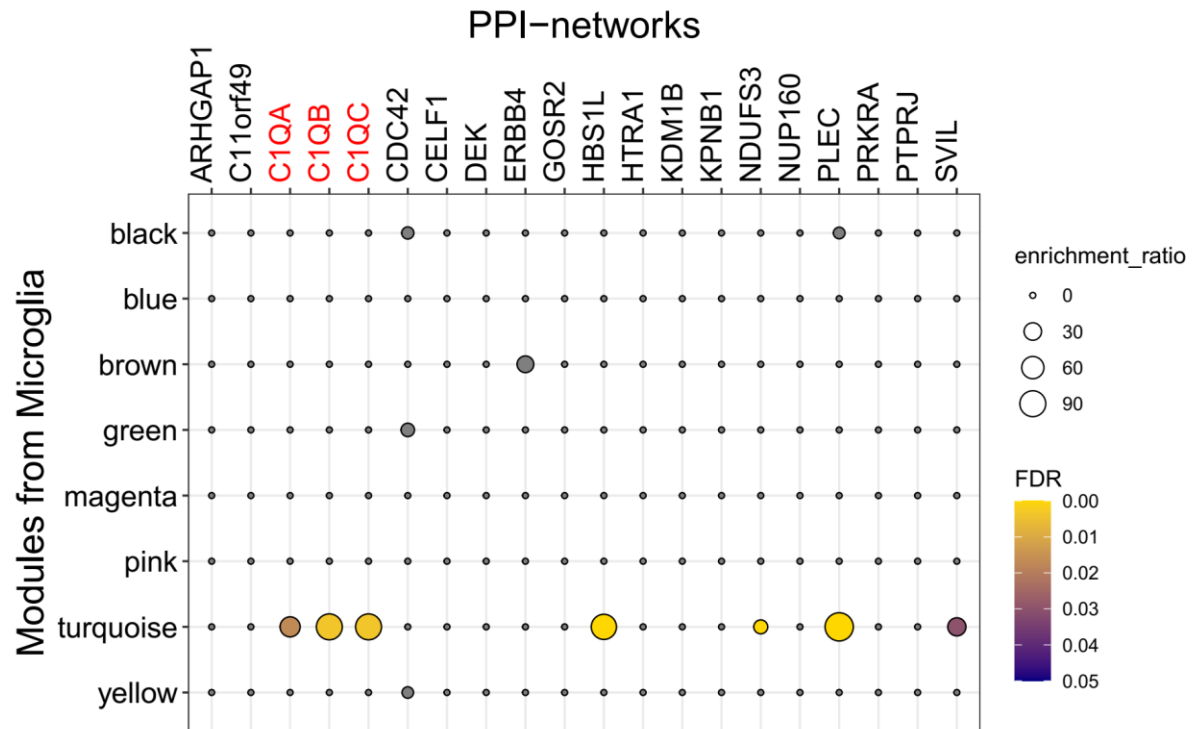

**Supplementary Figure 15** Enrichment of pathway genes in the protein interactomes of candidate genes in microglia using single nuclei transcriptomes of human post-mortem brain tissue from Alzheimer's disease cases and healthy controls. The C1Q-interacting module is the turquoise.

## Supplementary Tables

**Supplementary Table 1** Genetic correlation between Alzheimer's disease and the examined cardiovascular traits

| <b>Cardiovascular trait</b>    | <b><i>r</i></b> | <b><i>P</i></b> |
|--------------------------------|-----------------|-----------------|
| Atrial fibrillation            | 0.096           | 0.328           |
| Coronary artery disease        | 0.046           | 0.653           |
| Carotid intima-media thickness | -0.148          | 0.367           |
| Stroke                         | 0.198           | 0.238           |
| Systolic blood pressure        | -0.011          | 0.879           |
| Diastolic blood pressure       | 0.050           | 0.513           |

*r*: Genetic correlation value; *P*: Two-sided *P*-value

**Supplementary Table 2** Information of the previously published GWAS studies included in MTAG analysis

| <b>Trait</b>                          | <b>Publication</b>          | <b>Journal</b>        | <b>Studies</b>                                                                                                                                                                                                                                                                                                                          | <b>Sample Size</b> | <b>Source (doi)</b>        |
|---------------------------------------|-----------------------------|-----------------------|-----------------------------------------------------------------------------------------------------------------------------------------------------------------------------------------------------------------------------------------------------------------------------------------------------------------------------------------|--------------------|----------------------------|
| Alzheimer's disease (AD)              | Jansen et al., 2019         | Nature Genetics       | PGC-ALZ, ADSP, IGAP, UK Biobank                                                                                                                                                                                                                                                                                                         | 450k               | 10.1038/s41588-018-0311-9  |
| Atrial fibrillation (AF)              | Nielsen et al., 2018        | Nature Genetics       | HUNT, deCODE, MGI, DiscovEHR, UK Biobank, AFGen Consortium                                                                                                                                                                                                                                                                              | 1M                 | 10.1038/s41588-018-0171-3  |
| Coronary artery disease (CAD)         | Nikpay et al., 2015         | Nature Genetics       | ADVANCE, AGES, ARIC, BAS, CARDIOGENICS, CAS, CCGB, COROGENE, DUKE, EGCUT, FamHS, FGENTCARD, FHS, GenRIC, GerMIFS I-IV, GoDARTS, HPS, HSDS, BioMe Biobank, ITH, LIFE-Heart, LOLIPOP, LURIC, MAYOVDB, MedStar, MIGen, OHGS, PennCATH, PIVUS, PREDICTCVD, PROCARDIS, PROMIS, PROSPER, RS, SDS/AIDHS, THISEAS, TWINGENE, ULSAM, WGHs, WTCCC | 185k               | 10.1038/ng.3396            |
| Carotid intima-media thickness (CIMT) | Franceschini N et al., 2018 | Nature Communications | CHARGE                                                                                                                                                                                                                                                                                                                                  | 71k                | 10.1038/s41467-018-07340-5 |
| Stroke                                | Malik et al., 2018          | Nature Genetics       | METASTROKE, NINDS-SIGN, CHARGE, EPIC, AIDHS/SDS, VHIR-FMT-Barcelona, Biobank Japan, CADISP, COMPASS, deCODE, Glasgow Stroke Sample, Helsinki 2000 Ischemic Stroke Genetics, Hisayama_FSR, HVH 1&2, INTERSTROKE, MDC, RACE, SAHLIS, SIFAP, SLESS, UK -young lacunar stroke DNA resource, ICH                                             | 500k               | 10.1038/s41588-018-0058-3  |
| Systolic blood pressure (SBP)         | Evangelou et al., 2018      | Nature Genetics       | UK Biobank, ICBP                                                                                                                                                                                                                                                                                                                        | 750k               | 10.1038/s41588-018-0205-x  |
| Diastolic blood pressure (DBP)        | Evangelou et al., 2018      | Nature Genetics       | UK Biobank, ICBP                                                                                                                                                                                                                                                                                                                        | 750k               | 10.1038/s41588-018-0205-x  |

## Supplementary Methods

We conducted a GWAS meta-analysis on carotid intima-media thickness (cIMT) combining data from the cohorts UK Biobank<sup>1</sup> and CHARGE (Cohorts for Heart and Aging Research in Genomic Epidemiology) Consortium. CHARGE GWAS has been previously described<sup>2</sup>. The UK Biobank (UKBB) recruited ~500,000 individuals aged 40-69 from 2006-2010 and began a pilot phase in 2014 for imaging modalities relevant to cardiovascular research, including ultrasound of the carotid arteries in 100,000 participants<sup>3,4</sup>. Carotid intima-media thickness (cIMT) phenotyping was performed at one of the UKBB imaging centres. A detailed description of the carotid ultrasound protocol (UKBB Resource 511; <https://biobank.ctsu.ox.ac.uk/crystal/refer.cgi?id=511>), as well as the genotyping measures, imputation, and central quality control performed by the UKBB, can be found elsewhere<sup>1</sup>. After quality control, 42,449 cIMT measurements were available for analysis. GWAS of cIMT was performed using a linear mixed non-infinite model as implemented in BOLT-LMM<sup>5</sup>, adjusted for age, sex, genotyping centre and first four principal components.

## Supplementary References

- 1 Bycroft, C. *et al.* The UK Biobank resource with deep phenotyping and genomic data. *Nature* **562**, 203-209 (2018). <https://doi.org/10.1038/s41586-018-0579-z>
- 2 Franceschini, N. *et al.* GWAS and colocalization analyses implicate carotid intima-media thickness and carotid plaque loci in cardiovascular outcomes. *Nat Commun* **9**, 5141 (2018). <https://doi.org/10.1038/s41467-018-07340-5>
- 3 Littlejohns, T. J., Sudlow, C., Allen, N. E. & Collins, R. UK Biobank: opportunities for cardiovascular research. *Eur Heart J* **40**, 1158-1166 (2019). <https://doi.org/10.1093/eurheartj/ehx254>
- 4 Coffey, S. *et al.* Protocol and quality assurance for carotid imaging in 100,000 participants of UK Biobank: development and assessment. *Eur J Prev Cardiol* **24**, 1799-1806 (2017). <https://doi.org/10.1177/2047487317732273>
- 5 Loh, P. R., Kichaev, G., Gazal, S., Schoech, A. P. & Price, A. L. Mixed-model association for biobank-scale datasets. *Nat Genet* **50**, 906-908 (2018). <https://doi.org/10.1038/s41588-018-0144-6>
